# Supplementary material for: Influence of pre-existing multimorbidity on receiving a hip arthroplasty: cohort study of 28 025 elderly subjects from UK primary care
Source: HighWire-hosted journal article supplement (doi:10.1136/bmjopen-2020-046713), 2021-09-01
Supplement: bmjopen-2020-046713supp001_data_supplement.pdf [file bmjopen-2020-046713supp001_data_supplement.pdf]

1 Appendix 1: CPRD GOLD Coverage

2

3 The CPRD was established in 1987 and is a not-for-profit research service funded by the NHS  
4 National Institute for Health Research (NIHR) and the Medicines and Healthcare products  
5 Regulatory Agency (MHRA). It is now owned by the UK Department of Health. CPRD collects  
6 data from GP practices using Vision systems, with approximately 718 in total. The  
7 nomenclature of the CPRD has evolved over time: originally termed the General Practice  
8 Research Database (GPRD), until it was launched as the CPRD in 2012. It is now termed  
9 CPRD GOLD, to differentiate it from a recently launched 'sister' database CPRD Aurum that  
10 collects data from GP practices using EMIS Web software. Henceforth, use of the term CPRD  
11 refers to CPRD GOLD. CPRD contains the records of 17 million patients, of which 4.4 million  
12 are active, covering approximately 7% of the UK population (1). Importantly, CPRD patients  
13 are broadly representative of the UK population in terms of age, sex, ethnicity and body  
14 mass index distribution (2).

15

16

17 1. Clinical Practice Research Datalink. <https://www.cprd.com/intro.asp>.

18

19 2. Herrett E, Gallagher AM, Bhaskaran K, et al. Data Resource Profile: Clinical Practice  
20 Research Datalink (CPRD). *Int J Epidemiol*. 2015;44(3):827-836. doi:10.1093/ije/dyv098

21

1

2 **Appendix 2: Read codes for hip OA**

3 1. N053512 Hip OA NOS

4 2. N05z511 Hip OA NOS

5 3. N05zJ00 OA NOS, of hip

6 4. Nyu2100 [X]Other primary coxarthrosis

7 5. N051900 Primary coxarthrosis, bilateral

8

1 **Appendix 3: Disorders covered by the Quality and Outcomes Framework (QOF).**

2

3 1. asthma

4 2. atrial fibrillation

5 3. hypertension

6 4. cancer

7 5. chronic kidney disease

8 6. COPD

9 7. Dementia

10 8. Depression

11 9. diabetes,

12 10. epilepsy

13 11. heart failure

14 12. learning disability

15 13. mental health disorder

16 14. osteoporosis

17 15. peripheral arterial disease

18 16. rheumatoid arthritis

19 17. stroke and TIA

20

21
