# Supplementary material for: Influence of pre-existing multimorbidity on receiving a hip arthroplasty: cohort study of 28 025 elderly subjects from UK primary care
Source: HighWire-hosted journal article supplement (doi:10.1136/bmjopen-2020-046713), 2021-09-01

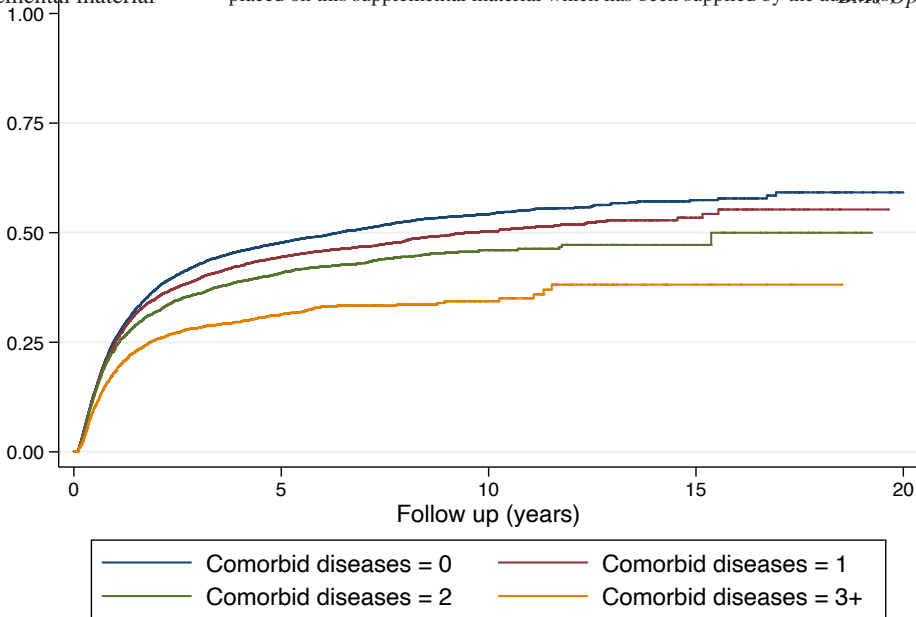

Supplement: bmjopen-2020-046713supp003_data_supplement.pdf [file bmjopen-2020-046713supp003_data_supplement.pdf]
